# Supplementary material for: The Effect of Photoperiod on Necrosis Development, Photosynthetic Efficiency and ‘Green Islands’ Formation in Brassica juncea Infected with Alternaria brassicicola
Source: MDPI journal article supplement (doi:10.3390/ijms22168435), 2021-08-05
Supplement: s1 [file s1]

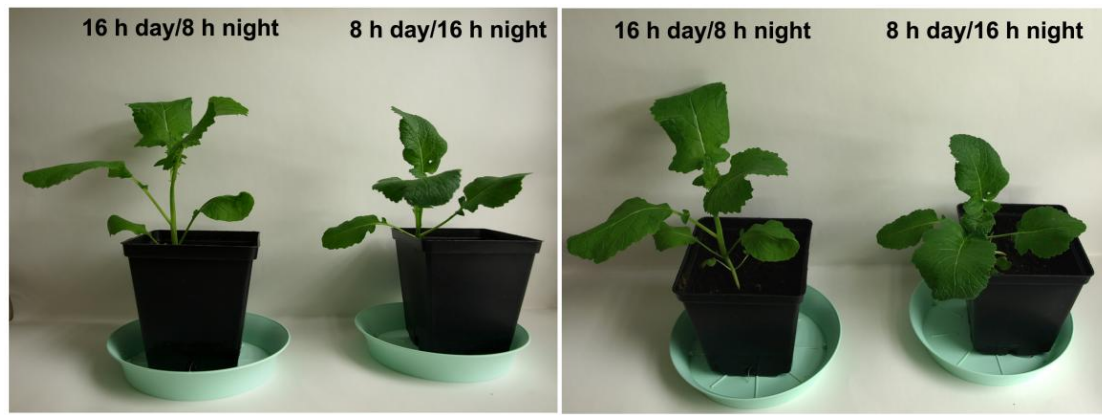

**Figure S1.** *Brassica juncea* plants grown under 16 h day/8 h night and 8 h day/16 h night photoperiods. The plants grown under an 8 h day/16 h night photoperiod had shorter stems than plants grown under a 16 h day/8 h night photoperiod.

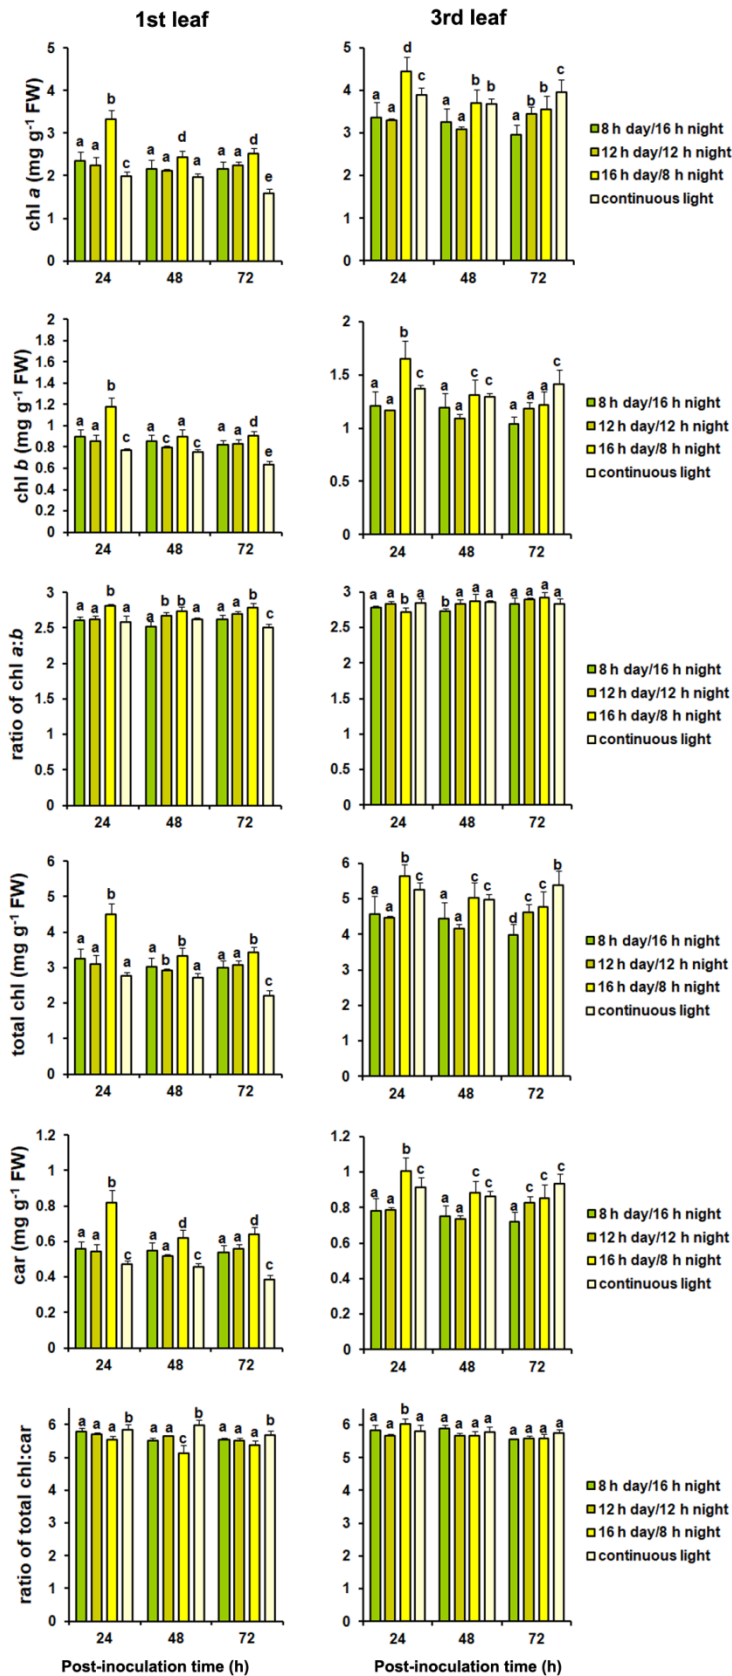

**Figure S2.** Influence of day length on chlorophyll and carotenoid contents in control leaves of *Brassica juncea*. The means  $\pm$  SE were obtained in 4 independent experiments ( $n = 4$ ). Different letters indicate statistical difference between means within leaf position according to Duncan's test ( $p < 0.05$ ). Abbreviations: car – carotenoids, chl – chlorophyll.

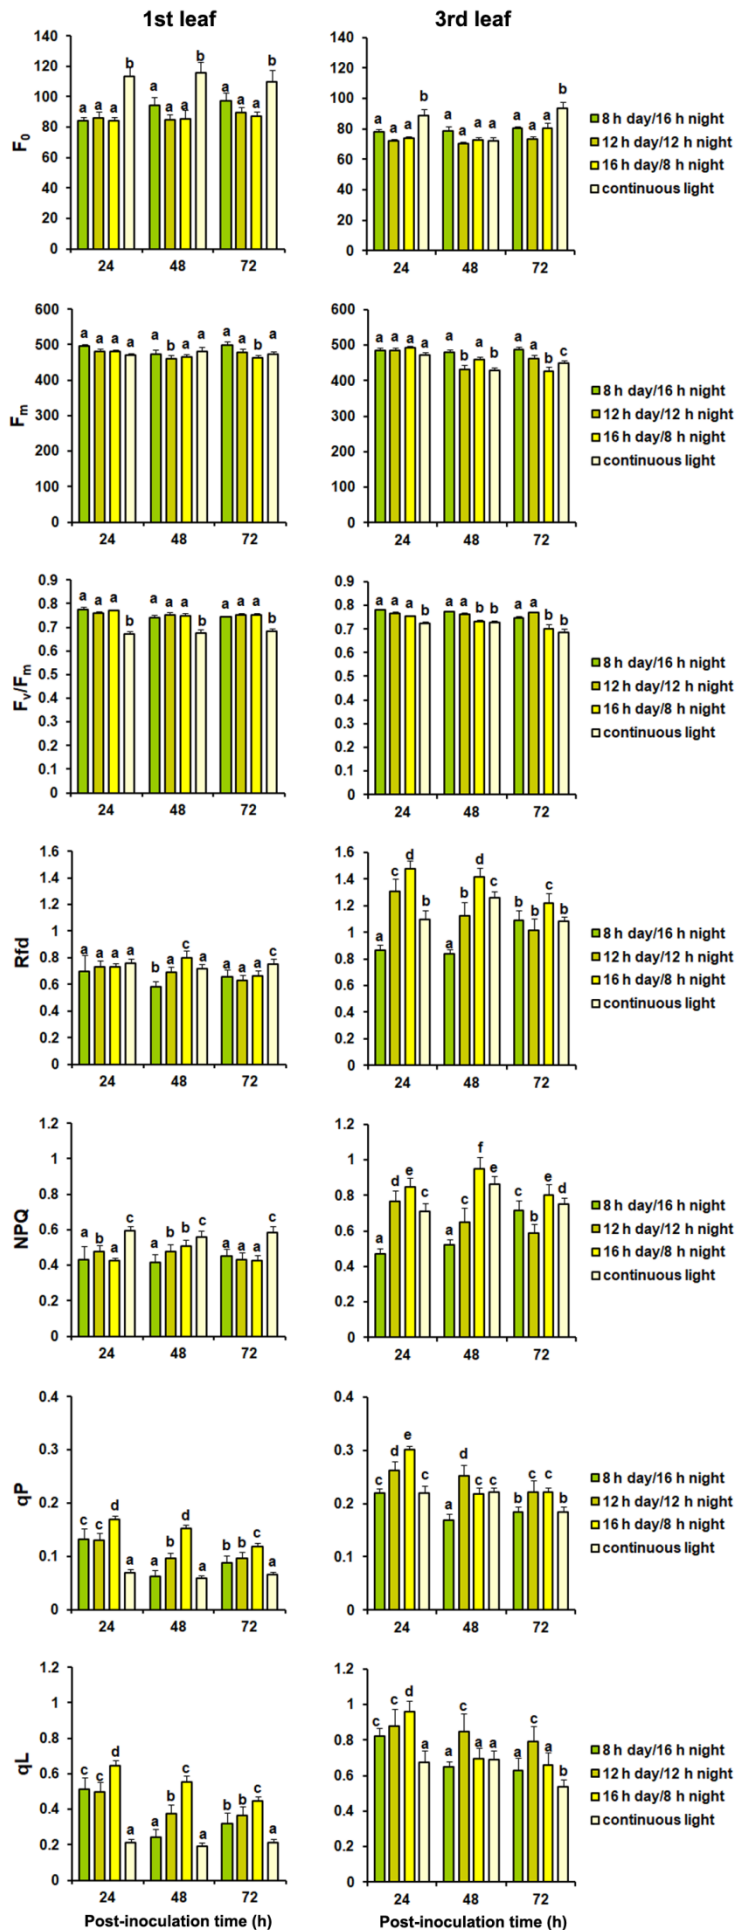

**Figure S3.** Influence of day length on chlorophyll *a* fluorescence parameters in control leaves of *Brassica juncea*. The means  $\pm$  SE were obtained from 3 independent experiments ( $n = 3$ ). Different letters indicate statistical difference between means within leaf position according to Duncan's test ( $p < 0.05$ ).

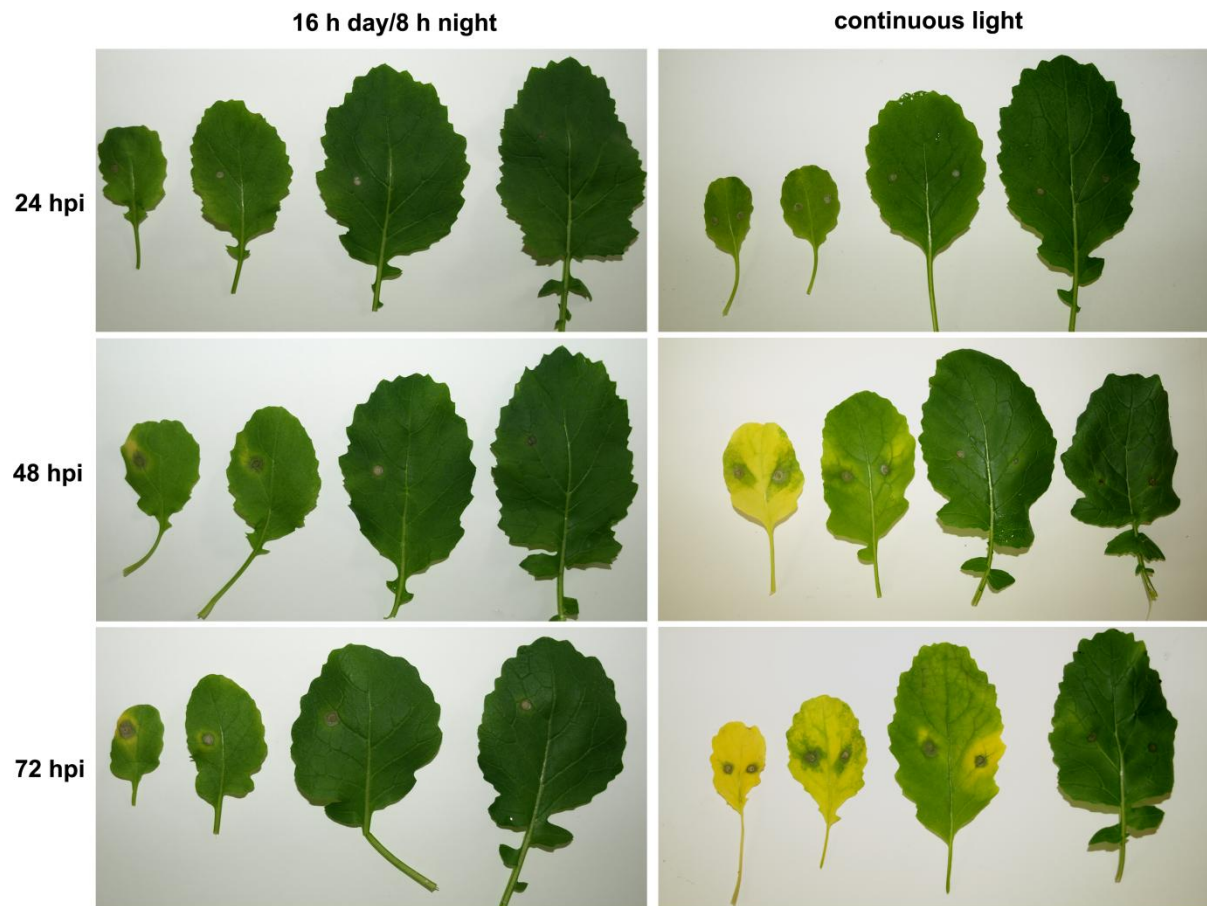

**Figure S4.** Time-course formation of 'green island' phenotype in *B. juncea* plants during infection with *A. brassicicola* under a 16 h day/8 h night photoperiod and continuous light.
