# Supplementary material for: The Effect of Photoperiod on Necrosis Development, Photosynthetic Efficiency and ‘Green Islands’ Formation in Brassica juncea Infected with Alternaria brassicicola
Source: Int J Mol Sci. 2021 Aug 5;22(16):8435. doi: 10.3390/ijms22168435 (PMC8395102; doi:10.3390/ijms22168435)
Supplement: Supplementary file 1 [file ijms-22-08435-s001.zip › Supplementary file Table S1-S4.xlsx]

## Sheet: Table S1
Table S1. Analysis of chlorophyll and carotenoid contents in Brassica juncea infected with Alternaria brassicicola. The means ± SE were obtained from 4 independent experiments (n = 4). Red indicates statistical significance
Parameter	Control 24 hpi mean	SE	Infection 24 hpi mean	SE	p-value Duncan test α<0.05		Control 48 hpi mean	SE	Infection 48 hpi mean	SE	p-value Duncan test α<0.05		Control 72 hpi mean	SE	Infection 72 hpi mean	SE	p-value Duncan test α<0.05
8 h day/16 h night	1st leaf
chlorophyll a	2.35324	0.203772	2.28859	0.197406	0.724312		2.16095	0.207887	2.04911	0.0649993	0.555539		2.16464	0.162153	1.76086	0.103807	0.364863
chlorophyll b	0.898977	0.065935	1.00277	0.14016	0.419892		0.853041	0.0625471	1.14887	0.0383221	0.0489149		0.823804	0.043113	1.06466	0.0737332	0.103903
ratio of chlorophyll a:b	2.61036	0.0465702	2.47886	0.0743699	0.0228627		2.52153	0.0688299	2.10686	0.0421805	0.000290858		2.62004	0.0690275	1.67498	0.0824873	2.28631e-05
total chlorophyll (a+b)	3.25222	0.269208	3.24192	0.346087	0.981786		3.01399	0.269572	3.51023	0.187014	0.318519		2.98844	0.204035	2.91954	0.127994	0.878035
carotenoids	0.559316	0.0390294	0.587497	0.0870197	0.753803		0.547946	0.0486743	0.556032	0.0402076	0.923526		0.540403	0.0365444	0.434497	0.0397754	0.213092
ratio of total chloropyll:car	5.79917	0.0887285	5.64203	0.365832	0.526305		5.50017	0.0989456	6.3424	0.136413	0.0172976		5.52986	0.0649215	6.92292	0.791726	0.00926413
8 h day/16 h night	3rd leaf
chlorophyll a	3.35469	0.365672	3.08773	0.244637	0.424477		3.25366	0.317475	3.31152	0.286096	0.847549		2.95009	0.24492	2.45979	0.138127	0.135172
chlorophyll b	1.21071	0.137799	1.1253	0.0841406	0.556474		1.19583	0.128953	1.41473	0.0996781	0.111898		1.03737	0.065349	1.17254	0.0587813	0.352351
ratio of chlorophyll a:b	2.77538	0.0269818	2.74116	0.0137885	0.722927		2.73073	0.0426946	2.33207	0.0557877	0.00605837		2.8367	0.0881935	2.10608	0.1235	2.10992e-05
total chlorophyll (a+b)	4.5654	0.50308	4.21303	0.328751	0.462382		4.44949	0.445972	4.72624	0.384702	0.56361		3.98746	0.307538	3.63233	0.173677	0.430702
carotenoids	0.780418	0.0729519	0.755567	0.0838425	0.782132		0.75256	0.0618717	0.756882	0.0597423	0.962555		0.717633	0.0577789	0.562273	0.0527215	0.0863232
ratio of total chlorophyll:car	5.82734	0.169313	5.65438	0.323261	0.577253		5.88706	0.111436	6.25229	0.210595	0.240948		5.56034	0.0224864	6.56309	0.39443	0.00458615
12 h day/12 h night	1st leaf
chlorophyll a	2.24084	0.194281	2.04254	0.101144	0.312484		2.12004	0.0410605	1.88709	0.18812	0.235938		2.2463	0.0833399	1.68079	0.0936436	0.00811209
chlorophyll b	0.852859	0.0606415	0.841421	0.0354951	0.119764		0.793505	0.0183125	0.85806	0.0812327	0.0251737		0.833018	0.0388375	0.923659	0.0376531	0.159499
ratio of chlorophyll a:b	2.6189	0.054182	2.42526	0.0182122	0.0555066		2.67362	0.0476359	2.1969	0.0309306	4.18725e-05		2.70066	0.0318143	1.82727	0.11783	1.90315e-05
total chlorophyll (a+b)	3.0937	0.254185	2.88396	0.136614	0.0171392		2.91355	0.0545446	2.74515	0.268792	0.103734		3.07931	0.121947	2.60445	0.107603	0.00888121
carotenoids	0.541495	0.0446192	0.531276	0.0298853	0.812888		0.516741	0.0120457	0.525061	0.0275478	0.837013		0.559836	0.0248731	0.539091	0.0264563	0.630711
ratio of total chlorophyll:car	5.71275	0.0441783	5.43646	0.0512099	0.20804		5.64024	0.0303462	5.20593	0.330391	0.0465622		5.50545	0.0780629	4.83985	0.106235	0.00227453
12 h day/12 h night	3rd leaf
chlorophyll a	3.294	0.0503398	3.38622	0.140045	0.77692		3.07818	0.0662874	2.75697	0.069282	0.00613951		3.43699	0.178855	2.83337	0.187149	2.73001e-05
chlorophyll b	1.16553	0.0116105	1.23369	0.0436911	0.253482		1.08717	0.0458004	1.09587	0.0172444	0.69136		1.18558	0.0596264	1.14717	0.0508361	0.183381
ratio of chlorophyll a:b	2.82655	0.0426588	2.74337	0.0237158	0.362046		2.83896	0.0616568	2.51555	0.0449793	0.00265536		2.89844	0.0280234	2.47546	0.15291	0.000162145
total chlorophyll (a+b)	4.45954	0.0554733	4.61991	0.183178	0.983584		4.16535	0.11137	3.85284	0.0823871	0.146139		4.62256	0.237796	3.98054	0.210769	0.0334064
carotenoids	0.78521	0.0142308	0.823074	0.0355571	0.380876		0.734571	0.0197367	0.716752	0.0161646	0.659735		0.825628	0.0384123	0.794759	0.0309685	0.474664
ratio of total chlorophyll:car	5.68137	0.0412587	5.61552	0.0345158	0.749618		5.67282	0.0906719	5.38667	0.196148	0.18831		5.59577	0.0641259	5.00534	0.137768	0.00646368
16 h day/8 h night	1st leaf
chlorophyll a	3.31693	0.120607	2.78223	0.101144	0.0263209		2.43561	0.154804	1.73003	0.127557	0.0166487		2.52819	0.114097	1.59274	0.1421	0.00126247
chlorophyll b	1.17866	0.0839965	1.08403	0.0498736	0.137786		0.896242	0.0688753	0.777482	0.0492088	0.0568819		0.909059	0.0412659	0.884905	0.106845	0.0552274
ratio of chlorophyll a:b	2.6189	0.054182	2.42526	0.0182122	0.0555066		2.72942	0.073606	2.1969	0.0309306	4.18725e-05		2.78296	0.0604386	1.73924	0.110772	1.90315e-05
total chlorophyll (a+b)	4.49559	0.310276	3.86626	0.143163	0.0171392		3.33185	0.220674	3.02397	0.531282	0.103734		3.43725	0.151728	2.47764	0.245578	0.00888121
carotenoids	0.81661	0.0729552	0.725038	0.0335232	0.187974		0.61918	0.0477563	0.569483	0.014446	0.938071		0.641881	0.0417015	0.515294	0.0497541	0.238518
ratio of total chlorophyll:car	5.53598	0.117209	5.34647	0.156594	0.141346		5.12565	0.24809	4.60676	0.344892	0.318572		5.38091	0.142403	4.20284	0.242741	0.000409343
16 h day/8 h night	3rd leaf
chlorophyll a	4.43972	0.335772	4.14966	0.181041	0.539115		3.70839	0.308914	3.67019	0.218429	0.0380295		3.5486	0.324468	2.32183	0.162277	4.7457e-05
chlorophyll b	1.17866	0.171118	1.55775	0.109691	0.276841		1.30741	0.149575	1.42581	0.122447	0.687702		1.21835	0.123663	1.15461	0.0785133	0.538698
ratio of chlorophyll a:b	2.71268	0.0713297	2.67974	0.085839	0.362046		2.87087	0.102447	2.59371	0.0843918	0.00265536		2.89844	0.0280234	2.1009	0.0905914	0.000162145
total chlorophyll (a+b)	5.6435	0.338158	5.70741	0.284473	0.983584		5.0158	0.457405	5.096	0.339598	0.146139		4.76695	0.445736	4.02622	0.575536	0.0334064
carotenoids	1.00815	0.0735865	0.972193	0.0628359	0.906978		0.882144	0.0652469	0.95162	0.0547229	0.315544		0.852622	0.0779776	0.717949	0.0677777	0.978881
ratio of total chlorophyll:car	6.03447	0.148113	5.89796	0.201804	0.706439		5.66548	0.143055	5.34989	0.112788	0.12503		5.59012	0.135845	5.03541	0.248215	0.00149799
continuous light	1st leaf
chlorophyll a	1.989	0.102092	1.94765	0.151405	0.984138		1.96539	0.0943747	0.882238	0.184541	0.000245176		1.57484	0.110689	0.865233	0.193405	0.0142543
chlorophyll b	0.7679	0.0191836	0.803434	0.0361931	0.556702		0.750602	0.0299138	0.460421	0.0932331	0.0191417		0.629724	0.0413771	0.493623	0.121274	0.828149
ratio of chlorophyll a:b	2.5864	0.087479	2.41495	0.099826	0.066478		2.6159	0.0262965	1.89879	0.0460944	2.65987e-05		2.50013	0.0545302	1.78168	0.0737609	2.66045e-05
total chlorophyll (a+b)	2.7569	0.118745	2.75109	0.185087	0.870903		2.716	0.124092	1.34266	0.277653	0.000490612		2.20457	0.150449	1.35886	0.312706	0.0459765
carotenoids	0.47234	0.0178134	0.487407	0.028809	0.576839		0.454599	0.0227761	0.372388	0.0230421	0.406075		0.40508	0.0189059	0.41831	0.0346124	0.544877
ratio of total chlorophyll:car	5.84002	0.172932	5.64793	0.237176	0.714232		5.98342	0.153063	4.06871	0.389981	3.94163e-05		5.68618	0.117653	2.54826	0.501126	2.32738e-05
continuous light	3rd leaf
chlorophyll a	3.89664	0.15588	3.79617	0.405531	0.0621805		3.68396	0.113346	3.2122	0.113426	0.152147		3.96407	0.287173	2.60748	0.156483	2.69027e-05
chlorophyll b	1.3706	0.0355313	1.59903	0.103762	0.00402535		1.29026	0.0395657	1.41242	0.0305078	0.213176		1.4104	0.139988	1.1063	0.0731511	0.00143404
ratio of chlorophyll a:b	2.84213	0.072644	2.68677	0.0892524	0.273609		2.85555	0.0260232	2.27332	0.05041	1.83073e-05		2.83347	0.0794185	2.36067	0.0336484	8.37472e-05
total chlorophyll (a+b)	5.26725	0.184356	5.3952	0.414525	0.0615344		4.97421	0.151618	4.62461	0.139011	0.140993		5.37447	0.4265	3.71377	0.228481	3.08849e-05
carotenoids	0.912116	0.0560638	0.854065	0.116837	0.111002		0.861391	0.0335109	0.855461	0.0360558	0.904537		0.932668	0.0588767	0.760647	0.0394092	0.00501211
ratio of total chlorophyll:car	5.80481	0.18258	5.94802	0.277474	0.420307		5.78572	0.155355	5.41437	0.0722068	0.493619		5.74478	0.111735	4.88659	0.221886	0.0274911

## Sheet: Table S2
Table S2. Factorial ANOVA of chlorophyll and carotenoid contents of Brassica juncea during Alternaria brassicicola infection. Red indicates statistical significance. Ss – sum of squares; Mss – mean sum of squares; F – Fisherʹs F‐test statistic; p - level of significance
		chlorophyll a				chlorophyll b				ratio of chlorophyll a:b				total chlorophyll				carotenoids				ratio of total chlorophyll:car
Source of variation	Degree of freedom	SS	MS	F	p	SS	MS	F	p	SS	MS	F	p	SS	MS	F	p	SS	MS	F	p	SS	MS	F	p
photoperiod	3	5.95851	1.98617	19.2832	3.37936e-10	0.62061	0.20687	11.7336	9.63043e-07	0.407184	0.135728	8.14173	5.18074e-05	10.2042	3.40141	12.6954	2.68391e-07	0.631049	0.21035	29.0758	5.22915e-14	9.57896	3.19299	25.8253	3.76921e-13
treatment	1	8.37298	8.37298	81.291	5.10703e-15	0.00540787	0.00540787	0.306734	0.580796	8.43497	8.43497	505.978	0	6.98628	6.98628	26.0756	1.19189e-06	0.0671011	0.0671011	9.27512	0.00289103	5.27817	5.27817	42.6905	1.35021e-09
leaf position	1	66.6767	66.6767	647.345	0	6.78434	6.78434	384.806	0	2.87649	2.87649	172.548	0	123.006	123.006	459.109	0	3.02862	3.02862	418.634	0	5.04732	5.04732	40.8234	2.77734e-09
post-inoculation time	2	9.10923	4.55461	44.2195	5.66214e-15	0.503687	0.251843	14.2845	2.9812e-06	2.30688	1.15344	69.1899	0	15.4841	7.74205	28.8964	4.83527e-11	0.178051	0.0890255	12.3056	1.46211e-05	7.85518	3.92759	31.7669	6.05827e-12
photoperiod*treatment	3	2.02812	0.67604	6.56348	0.00039002	0.351973	0.117324	6.65462	0.000354859	0.0261186	0.00870619	0.522247	0.667724	2.9908	0.996933	3.72095	0.0132513	0.0349684	0.0116561	1.61118	0.190738	9.74021	3.24674	26.26	2.52354e-13
photoperiod*leaf position	3	7.2351	2.4117	23.4145	6.68932e-12	1.53625	0.512082	29.0452	5.73985e-14	0.177181	0.0590605	3.54279	0.016497	14.6459	4.88196	18.2214	7.16549e-10	0.403967	0.134656	18.6129	7.00297e-10	2.46497	0.821657	6.64567	0.000329232
treatment*leaf position	1	0.0224832	0.0224832	0.218283	0.641235	0.000212218	0.000212218	0.0120369	0.912833	0.319026	0.319026	19.137	2.46069e-05	0.0518243	0.0518243	0.193429	0.660837	0.000415286	0.000415286	0.0574033	0.811082	2.15084	2.15084	17.3962	5.53161e-05
photoperiod*post-inoculation time	6	4.09877	0.683129	6.63231	4.818e-06	0.677913	0.112986	6.40852	7.93678e-06	0.204012	0.0340019	2.03963	0.0647968	10.0531	1.67552	6.25373	9.08488e-06	0.214252	0.0357087	4.93587	0.000160872	5.07993	0.846654	6.84785	2.51409e-06
treatment*post-inoculation time	2	3.81971	1.90985	18.5422	1.04772e-07	0.0956254	0.0478127	2.71193	0.0707709	2.66982	1.33491	80.0757	0	2.86943	1.43471	5.35492	0.00587037	0.0775489	0.0387744	5.35963	0.0059734	3.35685	1.67843	13.5753	4.46127e-06
leaf position*post-inoculation time	2	0.115474	0.0577368	0.56055	0.572447	0.0170765	0.00853827	0.484289	0.617419	0.265467	0.132733	7.9621	0.000545326	0.602241	0.30112	1.1239	0.328271	0.0107931	0.00539657	0.745946	0.476606	1.97517	0.987584	7.98771	0.000536475
photoperiod*treatment*leaf position	3	0.31471	0.104903	1.01848	0.387239	0.0997141	0.033238	1.88525	0.136146	0.0508199	0.01694	1.01616	0.387789	0.557623	0.185874	0.693758	0.557526	0.0199458	0.00664861	0.91901	0.434158	3.24925	1.08308	8.76012	2.48586e-05
photoperiod*treatment*post-inoculation time	6	1.64238	0.273729	2.65756	0.0188443	0.360865	0.0601441	3.41136	0.00395361	0.378767	0.0631278	3.78677	0.00164318	3.46208	0.577013	2.15364	0.0518739	0.044943	0.0074905	1.03538	0.406219	5.83384	0.972307	7.86415	3.14743e-07
photoperiod*leaf position*post-inoculation time	6	0.716842	0.119474	1.15994	0.332712	0.061267	0.0102112	0.579176	0.746252	0.119524	0.0199207	1.19496	0.312968	1.77797	0.296329	1.10602	0.362608	0.030362	0.00506033	0.69947	0.65057	2.3147	0.385784	3.12027	0.00689299
treatment*leaf position*post-inoculation time	2	1.4849	0.742451	7.20825	0.00112389	0.15936	0.0796798	4.51942	0.0129545	0.0473665	0.0236833	1.42066	0.245252	1.27269	0.636347	2.3751	0.0971903	0.03388	0.01694	2.34155	0.100829	1.53687	0.768436	6.21521	0.00264864
photoperiod*treatment*leaf position*post-inoculation time	6	0.789724	0.131621	1.27787	0.272951	0.180115	0.0300191	1.70268	0.126818	0.084219	0.0140365	0.84199	0.539713	1.45319	0.242198	0.90398	0.494395	0.0349351	0.00582252	0.804824	0.568204	1.24076	0.206793	1.67257	0.132781

## Sheet: Table S3
Table S3. Analysis of chlorophyll a fluorescence parameters in Brassica juncea infected with Alternaria brassicicola. The means ± SE were obtained from 3 independent experiments (n = 3). Red indicates statistical significance
8 h day/16 h night	1st leaf
Parameter	Description	Control 24 hpi mean	SE	Infection 24 hpi mean	SE	p-value Duncan test α<0.05		Control 48 hpi mean	SE	Infection 48 hpi mean	SE	p-value Duncan test α<0.05		Control 72 hpi mean	SE	Infection 72 hpi mean	SE	p-value Duncan test α<0.05
Fo	minimum fluorescence in dark-adapted state	84.2537	2.2015	94.37	4.00559	0.533277		94.3514	5.61648	125.101	8.58697	0.0657242		97.4269	5.16935	130.957	14.7639	0.0379164
Fo_Lss	steady-state minimum fluorescence in light	78.7237	2.43085	87.1243	3.41049	0.543622		86.9214	4.79616	111.959	6.95697	0.0788076		90.0223	5.06805	117.846	12.6271	0.0431822
Fm	maximum fluorescence in dark-adapted state	495.689	6.24148	436.889	9.26919	0.0015463		472.246	13.5255	424.134	9.61406	0.0112964		499.721	9.02233	431.181	12.8501	0.000399331
Fm_Lss	steady-state maximum fluorescence in light	353.315	15.8641	319.892	8.2188	0.115759		335.694	15.3778	313.092	12.0872	0.289922		349.868	15.0323	314.783	11.3302	0.098434
Fv/Fm_Lss	PSII maximum quantum yield in light-adapted steady-state	0.77625	0.00962465	0.726667	0.00993631	0.183557		0.738571	0.0143806	0.636111	0.0250899	0.00433002		0.742308	0.007085	0.635263	0.0288206	0.00427332
NPQ_Lss	steady-state non-photochemical quenching in light	0.42875	0.0791797	0.372381	0.0227502	0.391028		0.415714	0.0444467	0.373333	0.0336747	0.49142		0.449231	0.0443971	0.38	0.0282118	0.278574
qP_Lss	photochemical quenching of variable fluorescence steady-state in light	0.13125	0.0215835	0.0990476	0.00643298	0.0793583		0.0628571	0.0114879	0.0488889	0.00722599	0.443063		0.0869231	0.0147798	0.0657895	0.0130522	0.246914
Rfd_Lss	fluorescence decline ratio in steady-state, empiric parameter used to assess plant vitality	0.6975	0.122515	0.580476	0.0270931	0.171135		0.582857	0.0410409	0.523889	0.0371285	0.492901		0.654615	0.0596423	0.558947	0.0434472	0.264385
qL_Lss	fraction of PSII centers that are ‘open’ based on the lake model of PSII steady-state in light	0.51125	0.0700367	0.344762	0.0266067	0.013972		0.244286	0.0421933	0.148889	0.0233877	0.178238		0.321538	0.0570408	0.222632	0.0476761	0.162714
8 h day/16 h night	3rd leaf
Parameter	Description	Control 24 hpi mean	SE	Infection 24 hpi mean	SE	p-value Duncan test α<0.05		Control 48 hpi mean	SE	Infection 48 hpi mean	SE	p-value Duncan test α<0.05		Control 72 hpi mean	SE	Infection 72 hpi mean	SE	p-value Duncan test α<0.05
Fo	minimum fluorescence in dark-adapted state	78.0192	1.80509	72.3127	1.18904	0.242564		78.615	3.06796	82.6665	1.68914	0.436688		80.3054	1.15482	96.2339	6.14753	0.00201409
Fo_Lss	steady-state minimum fluorescence in light	72.515	1.66243	65.4559	1.27678	0.152739		72.4214	2.75403	74.5874	1.50888	0.650884		72.0125	1.20496	86.1926	5.59402	0.00402243
Fm	maximum fluorescence in dark-adapted state	483.727	9.14153	430.288	8.13804	0.00163345		478.733	8.36495	426.22	11.8423	0.00195573		487.528	6.54865	383.203	14.8385	2.39025e-05
Fm_Lss	steady-state maximum fluorescence in light	330.506	9.65427	268.102	9.86793	4.62919e-05		316.156	8.89931	276.596	8.71101	4.62919e-05		290.819	9.33692	252.983	6.84533	0.0092701
Fv/Fm_Lss	PSII maximum quantum yield in light-adapted steady-state	0.78	0.00507519	0.751364	0.00589576	0.219388		0.771429	0.0064499	0.724783	0.00975732	0.0516229		0.747917	0.00598849	0.650435	0.02778	8.17632e-05
NPQ_Lss	steady-state non-photochemical quenching in light	0.470833	0.0282161	0.634091	0.0448599	0.0355341		0.522857	0.029861	0.553043	0.0320353	0.663762		0.713333	0.0569791	0.520435	0.0523725	0.0123061
qP_Lss	photochemical quenching of variable fluorescence steady-state in light	0.219167	0.0096498	0.244545	0.0128212	0.207626		0.167857	0.012188	0.165217	0.0137865	0.895438		0.183333	0.0115731	0.143913	0.0156637	0.0740096
Rfd_Lss	fluorescence decline ratio in steady-state, empiric parameter used to assess plant vitality	0.8625	0.0461573	1.115	0.0760376	0.0174073		0.836429	0.0340428	0.871304	0.0494128	0.738451		1.09208	0.0690384	0.813913	0.0719457	0.010031
qL_Lss	fraction of PSII centers that are ‘open’ based on the lake model of PSII steady-state in light	0.821667	0.027215	0.792727	0.0234676	0.662587		0.646429	0.052588	0.546957	0.049569	0.159079		0.630833	0.0363902	0.439565	0.0568803	0.00639992
12 h day/12 h night	1st leaf
Parameter	Description	Control 24 hpi mean	SE	Infection 24 hpi mean	SE	p-value Duncan test α<0.05		Control 48 hpi mean	SE	Infection 48 hpi mean	SE	p-value Duncan test α<0.05		Control 72 hpi mean	SE	Infection 72 hpi mean	SE	p-value Duncan test α<0.05
Fo	minimum fluorescence in dark-adapted state	86.0382	4.35402	93.72	4.90786	0.503428		84.6162	3.63958	127.459	7.88025	0.000305797		89.3889	3.45238	144.418	7.98636	4.85879e-05
Fo_Lss	steady-state minimum fluorescence in light	79.4453	4.12121	86.1189	4.4203	0.45818		77.6631	3.0909	108.597	5.41604	0.000861739		82.6944	3.04011	120.394	6.17412	7.97036e-05
Fm	maximum fluorescence in dark-adapted state	479.916	9.03391	443.5	10.7183	0.111676		459.554	11.4573	399.444	9.84244	0.00632845		478.842	9.2336	338.151	15.8701	2.92159e-05
Fm_Lss	steady-state maximum fluorescence in light	328.602	11.8898	312.311	8.35544	0.420385		313.168	10.0358	277.315	13.3426	0.0745735		335.77	9.05329	238.324	12.7204	2.72422e-05
Fv/Fm_Lss	PSII maximum quantum yield in light-adapted steady-state	0.758235	0.00723733	0.726667	0.00881917	0.441416		0.751538	0.0110271	0.590588	0.0319866	9.28817e-05		0.752222	0.00777778	0.46931	0.0283492	2.92155e-05
NPQ_Lss	steady-state non-photochemical quenching in light	0.477647	0.0354647	0.425	0.0216667	0.402368		0.477692	0.0411556	0.478824	0.0516342	0.984122		0.432222	0.0383977	0.438276	0.0304606	0.914763
qP_Lss	photochemical quenching of variable fluorescence steady-state in light	0.13	0.0140378	0.112222	0.0112184	0.282991		0.0961538	0.0108331	0.0541176	0.00594452	0.0164233		0.0955556	0.0130289	0.0289655	0.0090883	0.000199451
Rfd_Lss	fluorescence decline ratio in steady-state, empiric parameter used to assess plant vitality	0.734706	0.0422625	0.648889	0.0311636	0.177213		0.689231	0.0445557	0.624118	0.0465664	0.325707		0.627778	0.0438678	0.577241	0.0309652	0.428195
qL_Lss	fraction of PSII centers that are ‘open’ based on the lake model of PSII steady-state in light	0.495882	0.0573499	0.388889	0.0406474	0.0618846		0.376154	0.0494785	0.21	0.0233106	0.000229455		0.364444	0.0513461	0.18	0.0171059	5.37465e-05
12 h day/12 h night	3rd leaf
Parameter	Description	Control 24 hpi mean	SE	Infection 24 hpi mean	SE	p-value Duncan test α<0.05		Control 48 hpi mean	SE	Infection 48 hpi mean	SE	p-value Duncan test α<0.05		Control 72 hpi mean	SE	Infection 72 hpi mean	SE	p-value Duncan test α<0.05
Fo	minimum fluorescence in dark-adapted state	72.0228	1.18235	70.7867	1.73353	0.85558		70.055	1.24934	82.392	3.52239	0.107823		73.5585	1.62512	98.4258	5.8026	0.000594522
Fo_Lss	steady-state minimum fluorescence in light	64.7522	1.02634	63.3483	1.51169	0.804381		63.5558	1.52013	71.5255	2.3784	0.172753		67.4485	1.735	84.6145	4.52746	0.00218407
Fm	maximum fluorescence in dark-adapted state	485.338	7.86733	416.747	12.2971	4.7941e-05		432.172	11.7291	396.709	8.35594	0.012785		463.197	8.88824	374.808	6.41906	2.87461e-05
Fm_Lss	steady-state maximum fluorescence in light	279.748	8.38297	247.533	7.23556	0.0116492		267.677	12.7516	237.889	8.48506	0.0197346		295.255	10.486	236.264	5.30729	3.23222e-05
Fv/Fm_Lss	PSII maximum quantum yield in light-adapted steady-state	0.766111	0.0060574	0.741667	0.00537788	0.261512		0.76	0.0089612	0.691	0.0156087	0.00143225		0.77	0.00392232	0.642121	0.0155502	2.3996e-05
NPQ_Lss	steady-state non-photochemical quenching in light	0.763889	0.065595	0.694444	0.0466822	0.344075		0.6475	0.0805485	0.692	0.0473764	0.543858		0.587692	0.0512429	0.599697	0.0277826	0.869883
qP_Lss	photochemical quenching of variable fluorescence steady-state in light	0.262778	0.0164059	0.258333	0.0154719	0.849637		0.2525	0.0197379	0.18	0.0117429	0.00349792		0.221538	0.021148	0.148485	0.0128373	0.00325977
Rfd_Lss	fluorescence decline ratio in steady-state, empiric parameter used to assess plant vitality	1.30722	0.0966998	1.20667	0.065039	0.316496		1.1225	0.101311	1.012	0.0522625	0.301759		1.01308	0.089	0.874545	0.036541	0.194697
qL_Lss	fraction of PSII centers that are ‘open’ based on the lake model of PSII steady-state in light	0.879444	0.0403779	0.802222	0.178311	0.328058		0.85	0.0701837	0.541	0.216768	0.000147482		0.79	0.0585071	0.408788	0.242793	5.83371e-05
16 h day/8 h night	1st leaf
Parameter	Description	Control 24 hpi mean	SE	Infection 24 hpi mean	SE	p-value Duncan test α<0.05		Control 48 hpi mean	SE	Infection 48 hpi mean	SE	p-value Duncan test α<0.05		Control 72 hpi mean	SE	Infection 72 hpi mean	SE	p-value Duncan test α<0.05
Fo	minimum fluorescence in dark-adapted state	84.0558	2.57738	80.4104	2.24198	0.582263		85.6821	5.71844	106.881	5.48472	0.00197695		86.9721	3.24038	153.008	6.22534	1.08705e-05
Fo_Lss	steady-state minimum fluorescence in light	338.418	5.82454	315.157	5.22894	0.639499		311.144	9.90794	308.257	7.16743	0.0013019		326.872	10.0277	289.046	9.0439	1.08705e-05
Fm	maximum fluorescence in dark-adapted state	479.915	5.41273	423.871	6.72858	4.21301e-05		464.605	9.48116	407.847	8.66225	3.35216e-05		461.944	7.90408	364.132	12.8843	2.57154e-06
Fm_Lss	steady-state maximum fluorescence in light	338.418	5.82454	315.157	5.22894	0.0504243		311.144	9.90794	308.257	7.16743	0.798277		326.872	10.0277	289.046	9.0439	0.00181613
Fv/Fm_Lss	PSII maximum quantum yield in light-adapted steady-state	0.769583	0.00498109	0.759231	0.00750227	0.615121		0.748947	0.00914134	0.682174	0.0126516	0.00118794		0.752632	0.00648174	0.508571	0.0248046	2.57154e-06
NPQ_Lss	steady-state non-photochemical quenching in light	0.42375	0.0187741	0.348077	0.0182885	0.0153502		0.507895	0.0374289	0.326087	0.0145789	4.31624e-06		0.427895	0.0313682	0.263929	0.0133268	4.62109e-06
qP_Lss	photochemical quenching of variable fluorescence steady-state in light	0.169583	0.00684929	0.184231	0.00780873	0.362348		0.151579	0.00784585	0.0943478	0.00738083	0.000547441		0.118947	0.00634739	0.0929286	0.0186156	1.08946e-05
Rfd_Lss	fluorescence decline ratio in steady-state, empiric parameter used to assess plant vitality	0.7325	0.0279897	0.65	0.0277738	0.0692331		0.801579	0.0494251	0.516522	0.0217023	4.30661e-06		0.663158	0.0418229	0.410714	0.0156553	2.58441e-06
qL_Lss	fraction of PSII centers that are ‘open’ based on the lake model of PSII steady-state in light	0.647083	0.0310124	0.659615	0.021494	0.801628		0.555263	0.0346357	0.294348	0.028171	1.10638e-05		0.445789	0.0255045	0.107143	0.0499453	1.08705e-05
16 h day/8 h night	3rd leaf
Parameter	Description	Control 24 hpi mean	SE	Infection 24 hpi mean	SE	p-value Duncan test α<0.05		Control 48 hpi mean	SE	Infection 48 hpi mean	SE	p-value Duncan test α<0.05		Control 72 hpi mean	SE	Infection 72 hpi mean	SE	p-value Duncan test α<0.05
Fo	minimum fluorescence in dark-adapted state	73.9929	1.14919	69.9575	1.47443	0.473422		72.9742	1.33336	73.2114	1.82193	0.962463		80.4015	3.78464	94.0993	6.23215	0.00656572
Fo_Lss	steady-state minimum fluorescence in light	271.468	6.64056	277.665	4.61877	0.676146		241.533	7.09672	240.884	7.68797	0.658434		240.31	9.40242	251.03	6.50325	0.000906021
Fm	maximum fluorescence in dark-adapted state	493.883	4.40337	439.442	7.89596	3.0469e-05		460.062	8.29297	395.604	8.48759	3.04659e-06		425.925	11.9835	387.074	9.93754	0.00275172
Fm_Lss	steady-state maximum fluorescence in light	271.468	6.64056	277.665	4.61877	0.541		241.533	7.09672	240.884	7.68797	0.948923		240.31	9.40242	251.03	6.50325	0.342175
Fv/Fm_Lss	PSII maximum quantum yield in light-adapted steady-state	0.754167	0.00517507	0.7705	0.00444114	0.310195		0.733077	0.00565057	0.726364	0.00608545	0.676602		0.702	0.0174507	0.667857	0.0171621	0.0338973
NPQ_Lss	steady-state non-photochemical quenching in light	0.846667	0.0516947	0.5875	0.0295837	0.00121025		0.947308	0.0702776	0.675909	0.0629631	0.000674032		0.8035	0.058554	0.549286	0.0310441	0.00152336
qP_Lss	photochemical quenching of variable fluorescence steady-state in light	0.30125	0.00654728	0.2875	0.0104094	0.38953		0.217308	0.0126923	0.212727	0.0114185	0.774391		0.222	0.0072038	0.1825	0.0137689	0.0219294
Rfd_Lss	fluorescence decline ratio in steady-state, empiric parameter used to assess plant vitality	1.48	0.0592098	1.13	0.0366348	0.000232575		1.41731	0.0651756	1.08864	0.0884408	0.000570163		1.2215	0.0703011	0.87	0.0515013	0.000218148
qL_Lss	fraction of PSII centers that are ‘open’ based on the lake model of PSII steady-state in light	0.96	0.0272734	0.969	0.0338098	0.868733		0.692692	0.0416895	0.660455	0.0348682	0.553826		0.6585	0.0339603	0.5225	0.045816	0.0125134
continuous light	1st leaf
Parameter	Description	Control 24 hpi mean	SE	Infection 24 hpi mean	SE	p-value Duncan test α<0.05		Control 48 hpi mean	SE	Infection 48 hpi mean	SE	p-value Duncan test α<0.05		Control 72 hpi mean	SE	Infection 72 hpi mean	SE	p-value Duncan test α<0.05
Fo	minimum fluorescence in dark-adapted state	113.266	6.4735	114.616	7.28329	0.930333		115.532	7.07542	198.574	18.5843	1.09525e-05		109.994	7.31676	145.809	14.4961	0.0366703
Fo_Lss	steady-state minimum fluorescence in light	99.6579	5.53271	100.471	6.19371	0.951		100.456	4.99238	166.386	14.8343	2.71346e-06		97.3052	6.3051	122.48	11.1345	0.0676396
Fm	maximum fluorescence in dark-adapted state	470.361	6.2016	409.827	9.17144	0.00074696		481.519	10.8841	420.51	15.7723	0.000871831		472.958	6.89562	271.329	20.9287	4.30657e-06
Fm_Lss	steady-state maximum fluorescence in light	298.859	7.60653	272.061	8.48338	0.0799711		311.751	9.26819	301.249	13.6886	0.522063		302.99	9.06255	204.536	15.6454	4.30671e-06
Fv/Fm_Lss	PSII maximum quantum yield in light-adapted steady-state	0.671034	0.0117794	0.635909	0.012921	0.240741		0.675769	0.0166056	0.46	0.0299637	2.57154e-06		0.6828	0.0131215	0.377826	0.0347547	4.06351e-06
NPQ_Lss	steady-state non-photochemical quenching in light	0.592069	0.029808	0.518182	0.0247116	0.13391		0.561154	0.0357699	0.409167	0.0265799	0.000997223		0.5832	0.0381345	0.326522	0.0292435	4.32393e-06
qP_Lss	photochemical quenching of variable fluorescence steady-state in light	0.0689655	0.00640091	0.0490909	0.00500688	0.0233125		0.0592308	0.00498993	0.0414286	0.00443394	0.0368552		0.0656	0.00532541	0.0325	0.0037183	0.000112158
Rfd_Lss	fluorescence decline ratio in steady-state, empiric parameter used to assess plant vitality	0.756207	0.0368575	0.664091	0.0299903	0.0908142		0.716923	0.0363943	0.5375	0.030128	0.000452836		0.75	0.0417572	0.470435	0.0289642	4.34092e-06
qL_Lss	fraction of PSII centers that are ‘open’ based on the lake model of PSII steady-state in light	0.211379	0.0205331	0.139545	0.017314	0.0105802		0.193462	0.019907	0.091	0.00956694	0.000218957		0.214167	0.0168961	0.0633333	0.00987293	4.11167e-06
continuous light	3rd leaf
Parameter	Description	Control 24 hpi mean	SE	Infection 24 hpi mean	SE	p-value Duncan test α<0.05		Control 48 hpi mean	SE	Infection 48 hpi mean	SE	p-value Duncan test α<0.05		Control 72 hpi mean	SE	Infection 72 hpi mean	SE	p-value Duncan test α<0.05
Fo	minimum fluorescence in dark-adapted state	88.6115	4.10655	84.0404	4.26279	0.523358		72.2781	2.2081	94.5604	6.28187	0.00402928		93.3967	4.10695	127.126	8.26568	1.41804e-05
Fo_Lss	steady-state minimum fluorescence in light	78.9491	3.83969	74.1529	3.80662	0.423566		63.38	2.09506	78.9988	4.98983	0.0153307		80.5373	3.15355	107.201	6.73883	1.69534e-05
Fm	maximum fluorescence in dark-adapted state	472.162	7.57707	410.347	7.54012	2.69689e-06		429.486	6.63988	346.227	7.82873	2.57154e-06		448.507	7.88927	378.266	10.3596	2.57273e-06
Fm_Lss	steady-state maximum fluorescence in light	281.919	8.56162	249.399	8.38336	0.00510819		236.297	8.24409	201.171	5.82484	0.00169039		259.172	6.38659	244.564	8.36349	0.220095
Fv/Fm_Lss	PSII maximum quantum yield in light-adapted steady-state	0.722059	0.00774803	0.702083	0.0106318	0.299598		0.729032	0.00594518	0.61	0.0183564	4.30744e-06		0.686061	0.0134132	0.561481	0.0218888	1.08705e-05
NPQ_Lss	steady-state non-photochemical quenching in light	0.711765	0.0443621	0.672917	0.0422273	0.503733		0.860645	0.0472056	0.73625	0.0340652	0.0417407		0.75	0.0353714	0.562593	0.0324217	0.00276916
qP_Lss	photochemical quenching of variable fluorescence steady-state in light	0.22	0.0136417	0.224583	0.0157192	0.793734		0.221613	0.00898142	0.121667	0.00947282	2.57263e-06		0.184242	0.00936457	0.0962963	0.00969842	1.09467e-05
Rfd_Lss	fluorescence decline ratio in steady-state, empiric parameter used to assess plant vitality	1.09794	0.0674844	1.05917	0.0523952	0.628115		1.25645	0.0530055	0.95	0.0459087	9.90283e-05		1.08	0.0392279	0.728889	0.0396722	7.30661e-06
qL_Lss	fraction of PSII centers that are ‘open’ based on the lake model of PSII steady-state in light	0.673824	0.0415562	0.66	0.0523125	0.791297		0.687742	0.0266588	0.309583	0.0294606	4.30657e-06		0.537576	0.0342286	0.233333	0.0295165	1.08753e-05

## Sheet: Table S4
Table S4. Factorial ANOVA of chlorophyll a fluorescence parameters of Brassica juncea during Alternaria brassicicola infection. Red indicates statistical significance. Ss – sum of squares; Mss – mean sum of squares; F – Fisherʹs F‐test statistic; p - level of significance
		F0				F0_Lss				Fm				Fm_Lss				Fv/Fm_Lss				NPQ_Lss				qP_Lss				Rfd_Lss				qL_Lss
Effect	Degree of freedom	SS	MS	F	p	SS	MS	F	p	SS	MS	F	p	SS	MS	F	p	SS	MS	F	p	SS	MS	F	p	SS	MS	F	p	SS	MS	F	p	SS	MS	F	p
photoperiod	3	111153	37051	39.8066	0	56214.6	18738.2	30.0908	0	151160	50386.7	21.9736	8.9817e-14	245254	81751.3	43.9725	0	1.64213	0.547375	90.5074	0	1.64269	0.547564	14.9928	1.51414e-09	0.634223	0.211408	73.3029	0	2.50871	0.836235	14.2241	4.45605e-09	9.60578	3.20193	103.561	0
treatment	1	95892.5	95892.5	103.024	0	58510.7	58510.7	93.9598	0	1.15927e+06	1.15927e+06	505.558	0	230054	230054	123.742	0	2.05637	2.05637	340.016	0	2.00558	2.00558	54.9145	2.72782e-13	0.248541	0.248541	86.1785	0	5.36834	5.36834	91.3135	0	5.85859	5.85859	189.486	0
leaf position	1	173806	173806	186.733	0	145930	145930	234.343	0	7928.7	7928.7	3.4577	0.0632593	453795	453795	244.088	0	0.501982	0.501982	83.0017	0	12.5525	12.5525	343.7	0	3.14683	3.14683	1091.12	0	41.7245	41.7245	709.718	0	27.8294	27.8294	900.097	0
post-inoculation time	2	71422.9	35711.5	38.3674	1.11022e-16	43105.9	21552.9	34.6109	2.9976e-15	226060	113030	49.2923	0	66003.6	33001.8	17.7511	2.67902e-08	1.30342	0.651708	107.759	0	0.406946	0.203473	5.57127	0.00392792	0.72274	0.36137	125.3	0	3.25258	1.62629	27.6626	2.06579e-12	10.147	5.0735	164.094	0
photoperiod*treatment	3	8553.23	2851.08	3.06312	0.0273497	3217.34	1072.45	1.72219	0.160754	34728.7	11576.2	5.04838	0.0017859	50522	16840.7	9.05829	6.43286e-06	0.274361	0.0914536	15.1217	1.26369e-09	1.40987	0.469955	12.8678	3.00054e-08	0.0296471	0.00988236	3.42658	0.0167058	1.83956	0.613187	10.4301	9.30281e-07	0.395181	0.131727	4.26049	0.00532352
photoperiod*leaf position	3	14077.6	4692.52	5.04151	0.00180302	6710.14	2236.71	3.59184	0.0133291	3862.17	1287.39	0.561429	0.640564	24764.1	8254.71	4.44006	0.0041517	0.168266	0.0560885	9.27412	4.74571e-06	1.17895	0.392982	10.7602	5.84141e-07	0.0257111	0.00857038	2.97167	0.030951	1.97299	0.657664	11.1866	3.20268e-07	0.306784	0.102261	3.30747	0.0196453
treatment*leaf position	1	28950.8	28950.8	31.1039	3.16779e-08	18739.1	18739.1	30.0923	5.25146e-08	11384.5	11384.5	4.96474	0.0260968	5047.9	5047.9	2.71518	0.0997205	0.337585	0.337585	55.8191	1.76525e-13	0.000360772	0.000360772	0.00987828	0.920849	4.72094e-05	4.72094e-05	0.0163692	0.898221	0.0714816	0.0714816	1.21588	0.270444	0.00022151	0.00022151	0.00716439	0.932563
photoperiod*post-inoculation time	6	10614.6	1769.1	1.90067	0.077839	7192.32	1198.72	1.92497	0.0739566	40708.9	6784.82	2.95885	0.00722855	8769.31	1461.55	0.786142	0.580835	0.0616517	0.0102753	1.699	0.118002	0.629709	0.104951	2.87367	0.0088305	0.0930825	0.0155137	5.37919	1.77417e-05	1.35709	0.226182	3.84728	0.000844352	1.61392	0.268987	8.69996	3.05534e-09
treatment*post-inoculation time	2	51265.6	25632.8	27.5392	2.3217e-12	32310.2	16155.1	25.9428	1.05447e-11	102155	51077.6	22.2749	3.47424e-10	24476.7	12238.4	6.5828	0.00144636	0.791187	0.395594	65.4106	0	0.259702	0.129851	3.55544	0.0289403	0.101301	0.0506506	17.5624	3.22817e-08	0.849686	0.424843	7.22643	0.000766758	1.43263	0.716316	23.1681	1.49277e-10
leaf position*post-inoculation time	2	16510.7	8255.35	8.86932	0.000152321	10910.1	5455.05	8.76002	0.000169583	24356.1	12178	5.31083	0.00508185	16228.8	8114.4	4.36459	0.0129696	0.0823828	0.0411914	6.81091	0.00115492	0.0657151	0.0328575	0.89967	0.407042	0.0283936	0.0141968	4.92256	0.00746529	0.435036	0.217518	3.69991	0.025074	0.279727	0.139863	4.52365	0.0110821
photoperiod*treatment*leaf position	3	137.082	45.694	0.0490924	0.985606	94.9313	31.6438	0.0508153	0.984865	15989.4	5329.81	2.32432	0.0734535	13097.4	4365.79	2.34828	0.0711657	0.0403677	0.0134559	2.22491	0.0837325	0.321235	0.107078	2.9319	0.0326475	0.0391643	0.0130548	4.52657	0.00368562	0.357468	0.119156	2.0268	0.108509	0.76358	0.254527	8.23225	2.0644e-05
photoperiod*treatment*post-inoculation time	6	18586.9	3097.82	3.32821	0.00299616	12235.2	2039.21	3.27467	0.00340812	35922.7	5987.12	2.61097	0.0162386	21888.6	3648.1	1.96225	0.0683465	0.133364	0.0222273	3.67523	0.00128895	0.44966	0.0749434	2.05202	0.0564131	0.0156075	0.00260125	0.901951	0.492677	0.546242	0.0910404	1.54856	0.159146	0.374553	0.0624255	2.01905	0.0605684
photoperiod*leaf position*post-inoculation time	6	32146.8	5357.8	5.75627	6.70104e-06	23196.7	3866.12	6.20843	2.07818e-06	118849	19808.1	8.63829	3.56183e-09	94939	15823.2	8.511	4.98247e-09	0.0611768	0.0101961	1.68591	0.121162	0.483829	0.0806382	2.20795	0.0401849	0.0548056	0.00913427	3.16719	0.00441277	0.56126	0.0935433	1.59114	0.146385	0.687926	0.114654	3.7083	0.00119024
treatment*leaf position*post-inoculation time	2	6888.62	3444.31	3.70047	0.02506	4205.97	2102.99	3.37709	0.0345468	41309.8	20654.9	9.00758	0.000132983	30943.3	15471.6	8.32192	0.000260838	0.143447	0.0717235	11.8593	8.15206e-06	0.0301582	0.0150791	0.412879	0.661858	0.0088589	0.00442945	1.53585	0.2158	0.210892	0.105446	1.7936	0.166909	0.0817235	0.0408617	1.32161	0.267193
photoperiod*treatment*leaf position*post-inoculation time	6	14069.9	2344.99	2.51939	0.020017	10903.8	1817.3	2.91833	0.00795195	63121.1	10520.2	4.58784	0.000132787	17876.2	2979.37	1.60255	0.14312	0.0704965	0.0117494	1.94274	0.071231	0.26893	0.0448217	1.22726	0.289611	0.0703204	0.0117201	4.06378	0.000494647	0.737635	0.122939	2.09115	0.0518447	0.673432	0.112239	3.63018	0.00144116
